# Supplementary material for: Erythrocyte Glutathione S-Transferase Activity as a Sensitive Marker of Kidney Function Impairment in Children with IgA Vasculitis
Source: MDPI journal article supplement (doi:10.3390/ijms25073795), 2024-03-28
Supplement: s1 [file s1]

Table S1. Routine laboratory findings in patients 3 months since the disease onset (Mann–Whitney U test)

|                                   | group  | N  | Min.   | Max.    | Centile |        |        | P      |
|-----------------------------------|--------|----|--------|---------|---------|--------|--------|--------|
|                                   |        |    |        |         | 25.     | Median | 75.    |        |
| ESR (mm/h)                        | IgAVwN | 55 | 2.00   | 51.00   | 4.00    | 6.00   | 12.00  | 0.795  |
|                                   | IgAVN  | 42 | 2.00   | 38.00   | 4.00    | 7.00   | 14.00  |        |
| CRP (mg/L)                        | IgAVwN | 55 | 0.10   | 19.40   | 0.30    | 0.30   | 1.70   | 0.590  |
|                                   | IgAVN  | 42 | 0.10   | 21.20   | 0.30    | 0.30   | 0.95   |        |
| Hb (g/L)                          | IgAVwN | 55 | 108.00 | 149.00  | 124.00  | 132.00 | 136.00 | 0.936  |
|                                   | IgAVN  | 42 | 112.00 | 161.00  | 122.75  | 129.50 | 139.00 |        |
| L ( $\times 10^9$ /L)             | IgAVwN | 55 | 4.80   | 19.40   | 6.70    | 8.10   | 10.10  | 0.790  |
|                                   | IgAVN  | 42 | 4.78   | 17.32   | 6.70    | 8.00   | 9.60   |        |
| Plt ( $\times 10^9$ /L)           | IgAVwN | 55 | 166.00 | 481.00  | 274.00  | 311.00 | 378.00 | 0.154  |
|                                   | IgAVN  | 42 | 240.00 | 461.00  | 293.75  | 335.50 | 370.50 |        |
| BUN (mmol/L)                      | IgAVwN | 55 | 1.80   | 7.70    | 3.50    | 3.90   | 4.70   | 0.922  |
|                                   | IgAVN  | 42 | 1.60   | 6.80    | 3.08    | 4.20   | 4.73   |        |
| Creatinin (mmol/L)                | IgAVwN | 55 | 27.00  | 81.00   | 32.00   | 39.00  | 46.00  | 0.003  |
|                                   | IgAVN  | 42 | 27.00  | 82.00   | 40.00   | 44.50  | 53.25  |        |
| Tot. proteins (g/L)               | IgAVwN | 55 | 60.00  | 78.00   | 67.00   | 70.00  | 73.00  | 0.163  |
|                                   | IgAVN  | 42 | 58.00  | 75.00   | 65.00   | 69.00  | 73.00  |        |
| IgA (g/L)                         | IgAVwN | 55 | 0.58   | 3.17    | 1.21    | 1.52   | 1.90   | 0.141  |
|                                   | IgAVN  | 42 | 0.82   | 4.48    | 1.21    | 1.68   | 2.13   |        |
| IgM (g/L)                         | IgAVwN | 55 | 0.34   | 1.83    | 0.75    | 0.90   | 1.10   | 0.382  |
|                                   | IgAVN  | 42 | 0.41   | 1.73    | 0.72    | 1.00   | 1.19   |        |
| IgG (g/L)                         | IgAVwN | 55 | 5.92   | 17.27   | 8.33    | 9.37   | 10.64  | 0.779  |
|                                   | IgAVN  | 42 | 1.91   | 13.62   | 7.69    | 9.08   | 11.28  |        |
| E/mm <sup>3</sup>                 | IgAVwN | 55 | 0.00   | 5.00    | 0.00    | 0.00   | 0.00   | <0.001 |
|                                   | IgAVN  | 42 | 0.00   | 4250.00 | 0.00    | 6.50   | 17.25  |        |
| 24h protein ex.                   | IgAVwN | 55 | 0.02   | 0.18    | 0.05    | 0.07   | 0.09   | 0.052  |
|                                   | IgAVN  | 42 | 0.02   | 0.94    | 0.05    | 0.08   | 0.11   |        |
| eGFR (ml/min/1.73m <sup>2</sup> ) | IgAVwN | 55 | 81.58  | 156.48  | 97.36   | 114.60 | 133.45 | 0.001  |
|                                   | IgAVN  | 42 | 74.36  | 142.22  | 89.40   | 101.05 | 115.05 |        |

Legend: IgAVwN – IgA vasculitis without nephritis, IgAVN – IgA vasculitis nephritis, ESR – erythrocyte sedimentation rate, CRP – C reactive protein, Hb – hemoglobin, L – leukocytes, Plt – platelets, BUN - blood urea nitrogen, E/mm<sup>3</sup> – erythrocytes per mm<sup>3</sup> of urine, 24h protein ex.- 24h urinary protein excretion, eGFR – estimated glomerular filtration rate

Table S2. Routine laboratory findings in patients 6 months since the disease onset (Mann–Whitney U test)

|                                   | group  | N  | Min.   | Max.    | Centile |        |        | P       |
|-----------------------------------|--------|----|--------|---------|---------|--------|--------|---------|
|                                   |        |    |        |         | 25.     | Median | 75.    |         |
| ESR (mm/h)                        | IgAVwN | 55 | 2.00   | 30.00   | 4.00    | 7.00   | 11.00  | 0.887   |
|                                   | IgAVN  | 42 | 1.00   | 23.00   | 4.75    | 7.50   | 11.25  |         |
| CRP (mg/L)                        | IgAVwN | 55 | 0.10   | 34.10   | 0.30    | 0.30   | 1.00   | 0.896   |
|                                   | IgAVN  | 42 | 0.10   | 19.90   | 0.30    | 0.30   | 0.93   |         |
| Hb (g/L)                          | IgAVwN | 55 | 108.00 | 147.00  | 122.00  | 129.00 | 136.00 | 0.771   |
|                                   | IgAVN  | 42 | 109.00 | 156.00  | 123.75  | 129.50 | 136.25 |         |
| L (x 10 <sup>9</sup> /L)          | IgAVwN | 55 | 2.60   | 11.90   | 7.00    | 8.10   | 9.20   | 0.667   |
|                                   | IgAVN  | 42 | 4.71   | 11.70   | 6.74    | 7.70   | 9.33   |         |
| Plt (x 10 <sup>9</sup> /L)        | IgAVwN | 55 | 176.00 | 503.00  | 267.00  | 311.00 | 378.00 | 0.665   |
|                                   | IgAVN  | 42 | 206.00 | 472.00  | 268.50  | 323.50 | 376.50 |         |
| BUN (mmol/L)                      | IgAVwN | 55 | 2.30   | 7.80    | 3.30    | 3.90   | 5.00   | 0.345   |
|                                   | IgAVN  | 42 | 2.20   | 6.10    | 3.20    | 3.84   | 4.33   |         |
| Creatinin (mmol/L)                | IgAVwN | 55 | 28.00  | 65.00   | 35.00   | 41.00  | 47.00  | 0.010   |
|                                   | IgAVN  | 42 | 27.00  | 78.00   | 39.75   | 45.50  | 55.50  |         |
| Tot. proteins (g/L)               | IgAVwN | 55 | 6.27   | 14.29   | 8.20    | 9.54   | 10.80  | 0.489   |
|                                   | IgAVN  | 42 | 4.82   | 13.52   | 8.12    | 9.03   | 10.37  |         |
| IgA (g/L)                         | IgAVwN | 55 | 0.66   | 2.95    | 1.10    | 1.52   | 1.79   | 0.164   |
|                                   | IgAVN  | 42 | 0.79   | 4.12    | 1.34    | 1.60   | 1.90   |         |
| IgM (g/L)                         | IgAVwN | 55 | 0.38   | 1.97    | 0.68    | 0.84   | 1.01   | 0.067   |
|                                   | IgAVN  | 42 | 0.47   | 1.80    | 0.74    | 1.05   | 1.23   |         |
| IgG (g/L)                         | IgAVwN | 55 | 6.27   | 14.29   | 8.20    | 9.54   | 10.80  | 0.489   |
|                                   | IgAVN  | 42 | 4.82   | 13.52   | 8.12    | 9.03   | 10.37  |         |
| E/mm <sup>3</sup>                 | IgAVwN | 55 | 0.00   | 5.00    | 0.00    | 0.00   | 0.00   | < 0.001 |
|                                   | IgAVN  | 42 | 0.00   | 8553.00 | 0.00    | 4.00   | 15.25  |         |
| 24h protein ex.                   | IgAVwN | 55 | 0.02   | 0.16    | 0.05    | 0.07   | 0.09   | 0.080   |
|                                   | IgAVN  | 42 | 0.03   | 0.85    | 0.06    | 0.08   | 0.09   |         |
| eGFR (ml/min/1.73m <sup>2</sup> ) | IgAVwN | 55 | 78.86  | 154.56  | 97.64   | 110.93 | 125.50 | 0.006   |
|                                   | IgAVN  | 42 | 67.40  | 146.04  | 88.61   | 100.17 | 114.55 |         |

Legend: IgAVwN – IgA vasculitis without nephritis, IgAVN – IgA vasculitis nephritis, ESR – erythrocyte sedimentation rate, CRP – C reactive protein, Hb – hemoglobin, L – leukocytes, Plt – platelets, BUN - blood urea nitrogen, E/mm<sup>3</sup> – erythrocytes per mm<sup>3</sup> of urine, 24h protein ex.- 24h urinary protein excretion, eGFR – estimated glomerular filtration rate

Table S3. Correlation of e-GST and standardly used marker of kidney function impairment in patients with IgAV

|                     |                         | IgAVN (N=42) |                  |                  | IgAVwN (N=55) |         |         |
|---------------------|-------------------------|--------------|------------------|------------------|---------------|---------|---------|
|                     |                         | e-GST 1      | e-GST 2          | e-GST 3          | e-GST 1       | e-GST 2 | e-GST 3 |
| eGFR 1              | Correlation Coefficient | -0.001       |                  |                  | 0.137         |         |         |
|                     | P                       | 0.996        |                  |                  | 0.318         |         |         |
| eGFR 2              | Correlation Coefficient |              | 0.135            |                  |               | 0.002   |         |
|                     | P                       |              | 0.394            |                  |               | 0.986   |         |
| eGFR 3              | Correlation Coefficient |              |                  | -0.151           |               |         | 0.129   |
|                     | P                       |              |                  | 0.340            |               |         | 0.348   |
| E/mm <sup>3</sup> 1 | Correlation Coefficient | 0.138        |                  |                  | -0.300        |         |         |
|                     | P                       | 0.383        |                  |                  | 0.026         |         |         |
| E/mm <sup>3</sup> 2 | Correlation Coefficient |              | 0.569            |                  |               | -0.071  |         |
|                     | P                       |              | <b>&lt;0.001</b> |                  |               | 0.608   |         |
| E/mm <sup>3</sup> 3 | Correlation Coefficient |              |                  | 0.698            |               |         | 0.098   |
|                     | P                       |              |                  | <b>&lt;0.001</b> |               |         | 0.476   |
| 24h ex. 1           | Correlation Coefficient | 0.262        |                  |                  | 0.226         |         |         |
|                     | P                       | 0.094        |                  |                  | 0.098         |         |         |
| 24h ex. 2           | Correlation Coefficient |              | 0.227            |                  |               | -0.161  |         |
|                     | P                       |              | 0.148            |                  |               | 0.241   |         |
| 24h ex. 3           | Correlation Coefficient |              |                  | 0.442            |               |         | 0.074   |
|                     | P                       |              |                  | 0.003            |               |         | 0.590   |
| Creat. 1            | Correlation Coefficient | -0,038       |                  |                  | 0,024         |         |         |
|                     | P                       | 0,809        |                  |                  | 0,865         |         |         |
| Creat. 2            | Correlation Coefficient |              | 0,282            |                  |               | 0,149   |         |
|                     | P                       |              | 0,070            |                  |               | 0,276   |         |
| Creat. 3            | Correlation Coefficient |              |                  | 0,281            |               |         | 0,114   |
|                     | P                       |              |                  | 0,071            |               |         | 0,407   |

Legend: IgAVwN – IgA vasculitis without nephritis, IgAVN – IgA vasculitis nephritis, e-GST – erythrocyte glutathione S-transferase activity, eGFR – estimated glomerular filtration rate, E/mm<sup>3</sup> – erythrocytes per mm<sup>3</sup> of urine, 24 h ex.- 24 h urinary protein excretion, Creat. - Serum creatinine

Table S4. Correlation of e-GST activity between patients with IgAVN with initial normal and abnormal urine findings

| IgAVN                           | e-GST   | N  | Min. | Max.  | Centile |        |      | P     |
|---------------------------------|---------|----|------|-------|---------|--------|------|-------|
|                                 |         |    |      |       | 25.     | Median | 75.  |       |
| initial normal urine findings   | e-GST 1 | 8  | 4.20 | 7.00  | 4.20    | 4.30   | 5.05 | 0.053 |
| initial abnormal urine findings |         | 34 | 3.40 | 10.02 | 4.75    | 5.80   | 7.50 |       |
| initial normal urine findings   | e-GST 2 | 8  | 4.50 | 7.80  | 5.55    | 6.10   | 6.95 | 0.152 |
| initial abnormal urine findings |         | 34 | 1.50 | 9.60  | 4.1     | 4.80   | 6.05 |       |
| initial normal urine findings   | e-GST 3 | 8  | 4.10 | 6.20  | 4.45    | 5.30   | 5.75 | 0.392 |
| initial abnormal urine findings |         | 34 | 1.20 | 9.50  | 3.10    | 3.80   | 5.85 |       |

Legend: IgAVN – IgA vasculitis nephritis, e-GST – erythrocyte glutathione S-transferase activity
